### Predictors of adverse cardiovascular events in patients with truncating variants in the filamin c (flnc) gene

M. Akhtar<sup>1</sup>, D. Rangel-Sousa<sup>2</sup>, J. Palomino-Doza<sup>3</sup>, X. Arana Achaga<sup>4</sup>, Z. Bilinska<sup>5</sup>, E. Zamarreno Golvano<sup>6</sup>, V. Climent<sup>7</sup>, M. Navarro Penalver<sup>8</sup>, R. Barriales-Villa<sup>9</sup>, P. Charron<sup>10</sup>, R. Yotti<sup>11</sup>, E. Zorio<sup>12</sup>, J. Jimenez-Jaimez<sup>13</sup>, P. Garcia-Pavia<sup>14</sup>, P.M. Elliott<sup>2</sup>

<sup>1</sup>Barts Health NHS Trust, London, United Kingdom; <sup>2</sup>University College London, London, United Kingdom; <sup>3</sup>University Hospital 12 de Octubre, Madrid, Spain; <sup>4</sup>University Hospital Donostia, Donostia-San Sebastian, Spain; <sup>5</sup>The Cardinal Stefan Wyszyński Institute of Cardiology, Warsaw, Poland; <sup>6</sup>Hospital de Basurto, Bilbao, Spain; <sup>7</sup>General University Hospital of Alicante, Alicante, Spain; <sup>8</sup>Hospital Universitario Virgen Arrixaca, Murcia, Spain; <sup>9</sup>Instituto de Investigación Biomédica de A Coruña (INIBIC), A Coruna, Spain; <sup>10</sup>Hospital Pitie-Salpêtrière, Paris, France; <sup>11</sup>University Hospital Gregorio Marañon, Madrid, Spain; <sup>12</sup>Hospital Universitario y Politécnico La Fe, Valencia, Spain; <sup>13</sup>University Hospital Virgen de las Nieves, Granada, Spain; <sup>14</sup>Hospital Universitario Puerta de Hierro, Madrid, Spain

On behalf of European Genetic Cardiomyopathies Initiative Investigators

**Funding Acknowledgement:** NIHR Biomedical Research Centre; Instituto de Salud Carlos III; DETECTIN-HF project; Wellcome Trust; CIBERCV; EU Regional Development Fund; FEDER.

**Background:** Truncating variants in Filamin C (FLNCTv) are associated with arrhythmogenic (AC) and dilated cardiomyopathies (DCM). Affected patients are reported to demonstrate a high incidence of arrhythmic and heart-failure related cardiovascular events. The aim of this study was to determine factors that predict adverse events in mutation carriers.

**Methods:** The study cohort comprised 168 FLNCTv carriers followed at 19 European centres. Baseline and longitudinal follow-up clinical data were collected. The primary endpoint was a composite of sudden cardiac death (SCD), aborted SCD, appropriate implantable cardioverter-defibrillator (ICD) shock, cardiac transplantation (HTx) and mortality from end-stage heart failure (ESHF).

**Results:** 47 different pathogenic or likely-pathogenic FLNCTv were identified in 60 unrelated probands. In those with baseline and longitudinal data (160 patients; 57 probands), 114 (71.3%) patients exhibited evidence of cardiac disease at initial evaluation. Gene penetrance was 85% by the age of 40 years. During a median follow-up of 1.5 years (IQR 4.1), 24 individuals (15%) reached the primary endpoint – 16 arrhythmic (SCD/aborted SCD/ICD shock) and 8 heart failure (ESHF/HTx) related-events. Univariable predictors at baseline evaluation of the composite primary endpoint

included proband status (HR 4.0, 95% CI: 1.5–10.9, p=0.01), symptoms of dyspnoea (HR 2.8, 95% CI: 1.2–6.4, p=0.02), LV systolic dysfunction (LVSD) (HR 12.4, 95% CI: 2.9–53.2, p=0.001), frequent ventricular ectopy (VE>500) on 24-hour Holter (HR 9.3, 95% CI: 1.2–74.7, p=0.04) and the presence of late gadolinium enhancement on CMR (HR 8.9, 95% CI: 1.2–68.5, p=0.04).

Multivariable analysis identified LVSD (LVEF <50%) at baseline as an independent predictor of the primary endpoint with a hazard ratio of 8.6 (95% CI: 1.8–41.5, p=0.007). ROC analysis using LV systolic dysfunction to predict the primary endpoint demonstrated an area under the curve of 0.84 (95% CI: 0.76–0.91, p<0.001) and identified an optimal LVEF “cut-off” of 47% for predicting adverse events with a Youden’s index of 0.61 (sensitivity 0.91; specificity 0.70).

**Conclusions:** LVSD is associated with an over 8-fold increase in the hazard of a primary endpoint event in FLNCTv gene carriers indicating that these patients should be considered for implantable cardioverter-defibrillator (ICD) implantation, optimal heart failure medical therapy and close clinical follow-up.

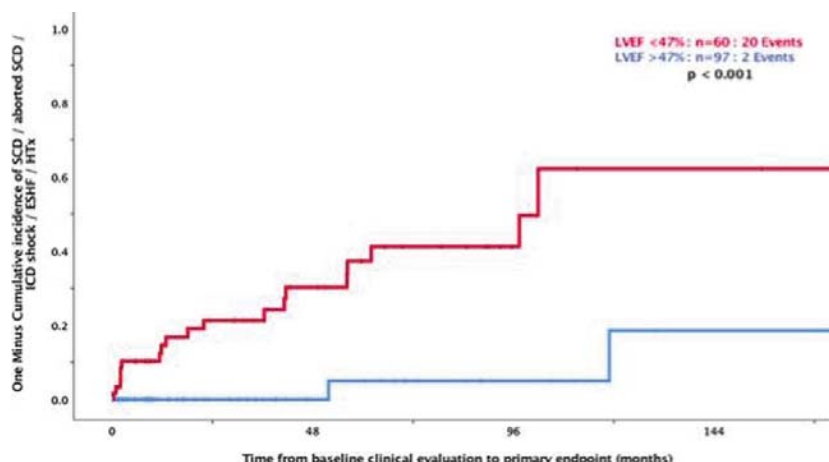

| Number at Risk | 0-24 months | 24-48 months | 48-72 months | 72-96 months | 96+ months |
|----------------|-------------|--------------|--------------|--------------|------------|
| LVEF ≥ 47%     | 97          | 38           | 20           | 13           | 9          |
| LVEF < 47%     | 60          | 34           | 22           | 13           | 7          |

Kaplan-Meier plot to demonstrate freedom
